# Supplementary material for: pyseer: a comprehensive tool for microbial pangenome-wide association studies
Source: PubMed Central journal article supplement (PMC6289128; doi:10.1093/bioinformatics/bty539), 2018-07-02
Supplement: bty539_supplementary_material.pdf [file bty539_supplementary_material.pdf]

## Supplementary material

**Supplementary table 1:** Resource comparison between *pyseer* and *SEER* using the tutorial dataset (15.1M k-mers, no filtering).

| Association model          | Cores | <i>pyseer</i> |             | <i>SEER</i> |             |
|----------------------------|-------|---------------|-------------|-------------|-------------|
|                            |       | CPU (hrs)     | Memory (Mb) | CPU (hrs)   | Memory (Mb) |
| Fixed effects (binary)     | 1     | 65.9          | 90          | 58.3        | 490         |
|                            | 4     | 28.4          | 450         | 25.2        | 500         |
| Fixed effects (continuous) | 1     | 15.3          | 70          | 3.6         | 470         |
| Mixed effects              | 1     | 8.1           | 150         | NA          | NA          |
|                            | 4     | 5.8           | 1600        | NA          | NA          |

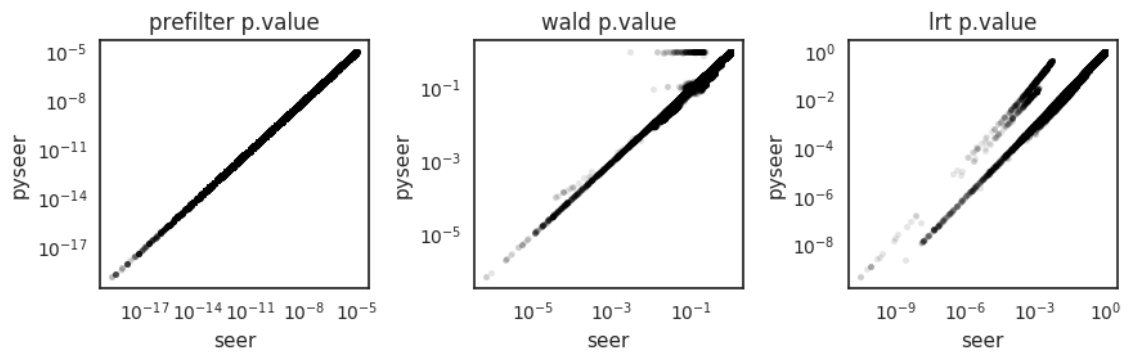

**Supplementary figure 1:** p-p plot comparing p-values of association between SEER (x-axis) and pyseer (y-axis) on a test dataset. Filter p-values (left) were identical. Wald test p-values (centre) were mostly the same, but we removed this test from pyseer due to its lower power compared to the likelihood ratio test. The likelihood-ratio test p-values (right) revealed an error in the likelihood of Firth regression in SEER, which has been fixed in pyseer. Otherwise, p-values were the same within precision of the normal distribution cdf used to calculate them.

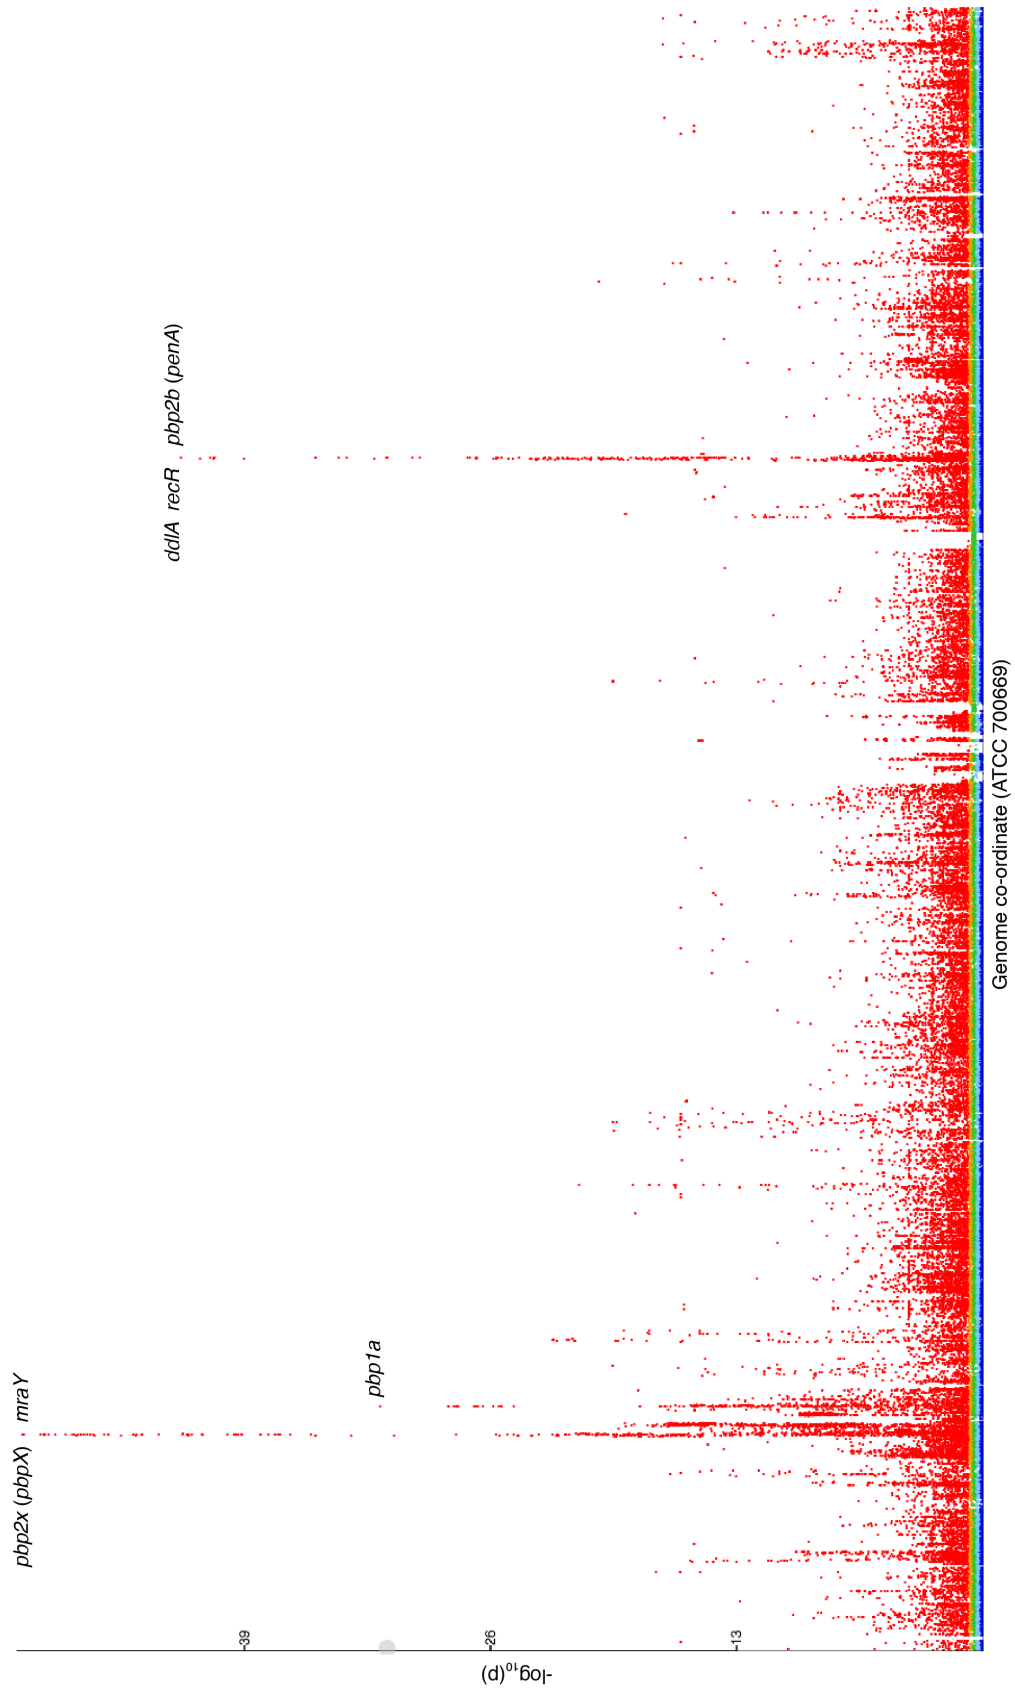

**Supplementary figure 2:** An example Manhattan plot from a SNP-based GWAS of penicillin resistance in the tutorial dataset using *S. pneumoniae* (<http://pyseer.readthedocs.io/en/version2/tutorial.html>). We produced the plot using the fixed effects model in pyseer, and visualised the results using phandango.

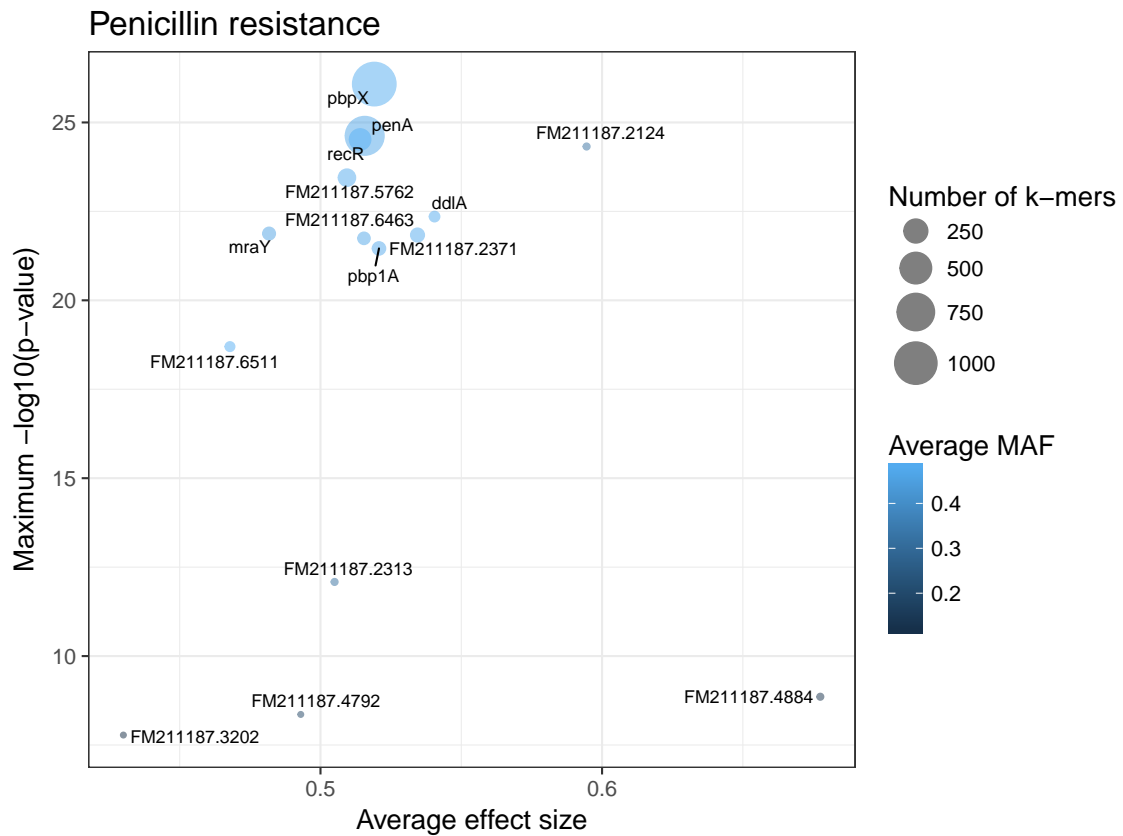

**Supplementary figure 3:** An example gene-based summary plot from the same data as the Manhattan plot fig. 2. The maximum p-value of association for each gene is shown on the y-axis as in the Manhattan plot and the average effect size on the x-axis. The size of each gene corresponds to the number of significant k-mers overlapping it, and the colour to the average minor allele frequency (MAF) of the overlapping significant k-mers. The plot shows a difference between more common results (for example *penA* and *penX*, which are causal) and rarer results (for example *FM211187.4884*, which is a false positive). *recR* and *ddlA* are in linkage disequilibrium with the top hits due to their proximity in the genome, which is easier to assess using the Manhattan plot.
